# Supplementary material
Source: publisher figshare collection journal article supplement (https://acs.figshare.com/ndownloader/files/3854071)
Supplement: Supplementary file 1 [file 3854071]

## Supporting Information

### Determination of Nanoparticle Size by Measuring the Metal-Metal Bond Length: The Case of Palladium Hydride

*Jianqiang Wang<sup>1</sup>, Qi Wang<sup>2</sup>, Xinghua Jiang<sup>1</sup>, Zhongneng Liu<sup>1</sup>, Weimin Yang<sup>1</sup>,\* and  
Anatoly I. Frenkel<sup>3</sup>, \**

<sup>1</sup>Sinopec Shanghai Research Institute of Petrochemical Technology, Shanghai, China.

<sup>2</sup>Department of Chemical Engineering, University of Delaware, Newark, DE 19717,  
United States.

<sup>3</sup>Physics Department, Yeshiva University, New York, NY 10016, United States.

\*email: [yangwm.sshy@sinopec.com](mailto:yangwm.sshy@sinopec.com), [anatoly.frenkel@yu.edu](mailto:anatoly.frenkel@yu.edu)

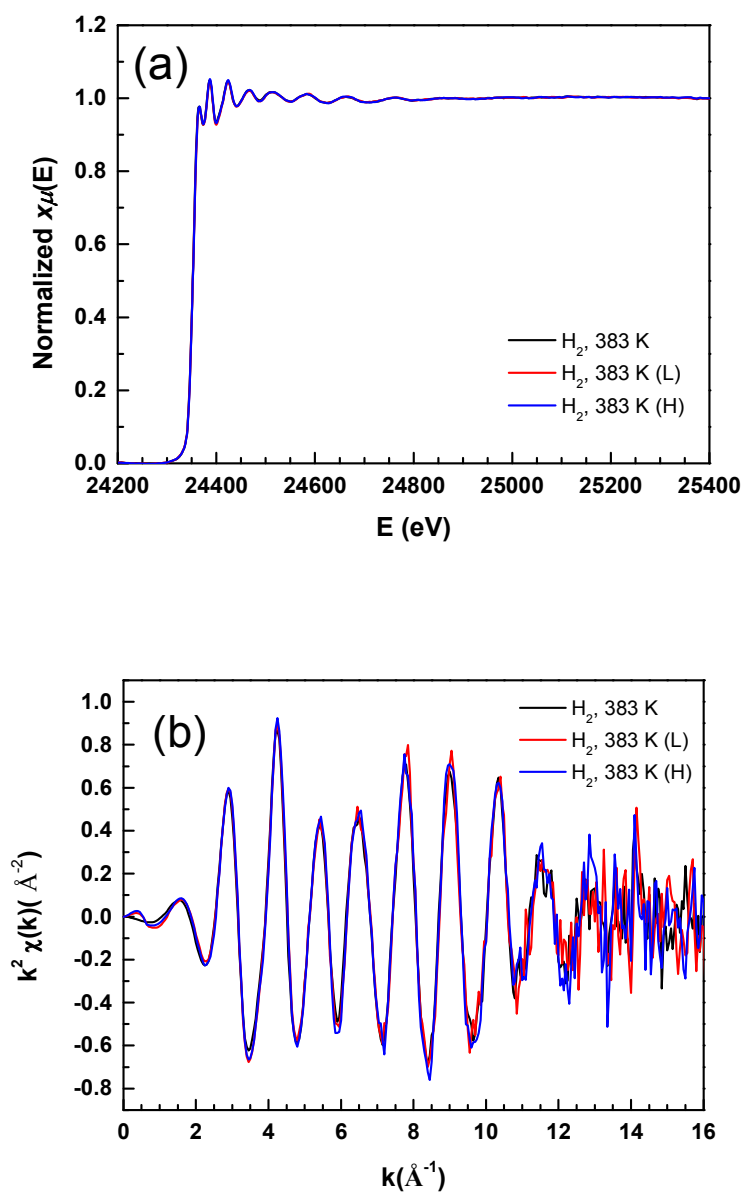

**Figure S1.** (a) Normalized XAS region of absorption coefficient of Pd K-edge. (b) EXAFS data of Pd catalyst under 50% $H_2$ /He at same temperature (383 K). L stands for the data measured after reaching the lowest temperature of 186 K, and H stands for the one measured after reaching the highest temperature of 483 K. The temperature schedules are shown in Figure 1 of the manuscript.

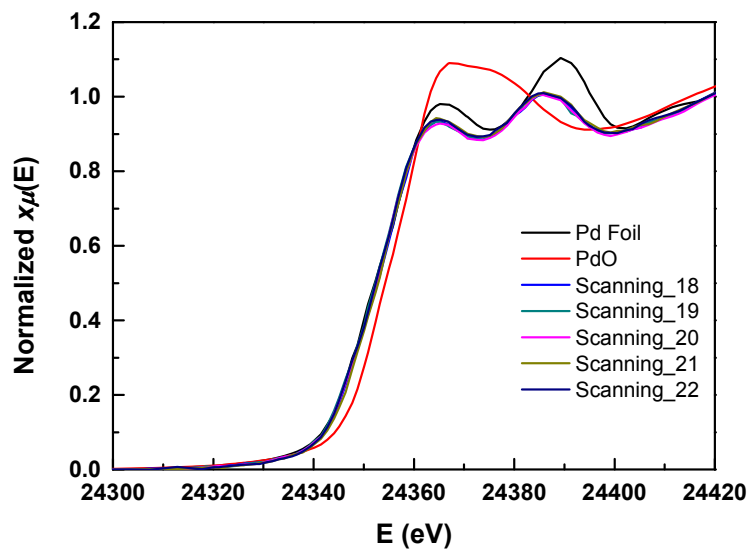

**Figure S2.** Normalized XANES region of absorption coefficient of Pd K-edge. Curves labeled Scanning\_18 to Scanning\_22 present the final 5 consecutive runs used for checking the stability of formation of reduced state.

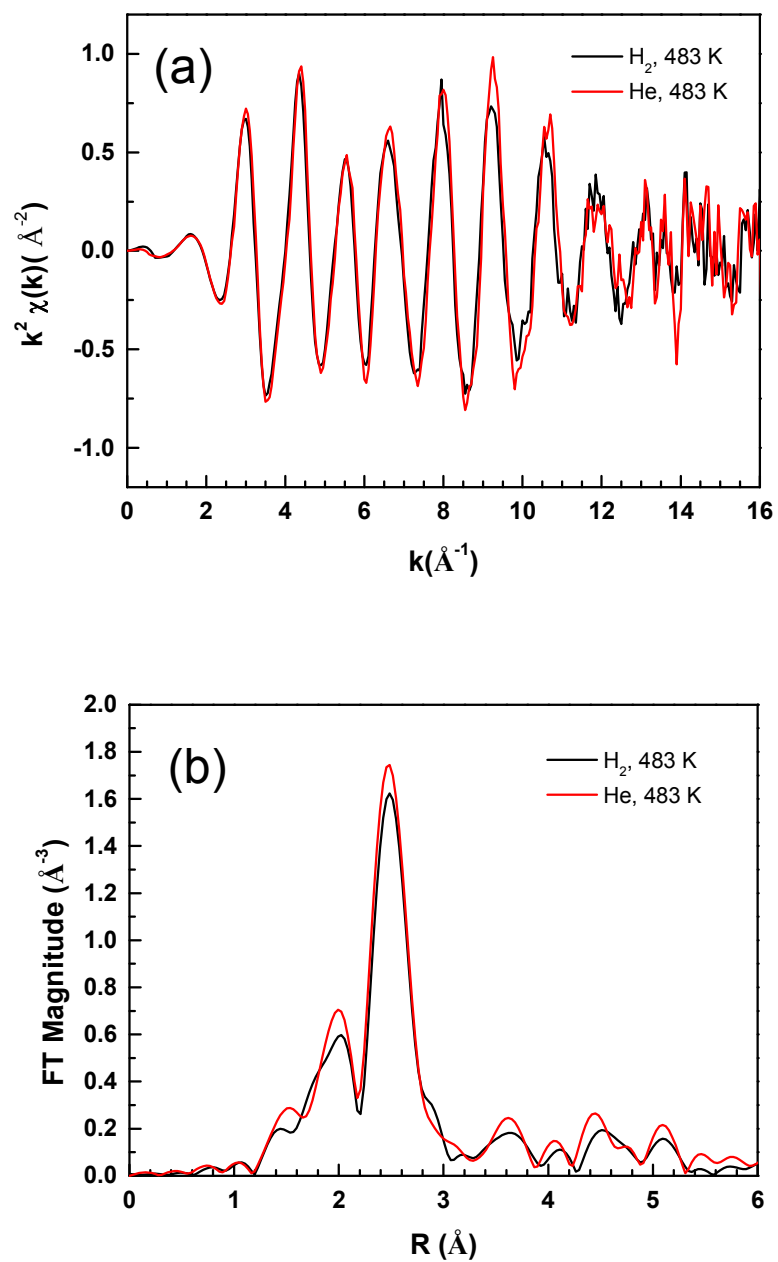

**Figure S3.** (a) EXAFS data measured under  $\text{H}_2$  and  $\text{He}$  at 483 K in  $k$ -space (a) and  $r$ -space (b).  $k$ -weighting of 2 and  $k$ -range of 2-16  $\text{\AA}^{-1}$  was used for Fourier transforms,

**Table S1** The calculation of H/Pd ratio by a modified empirical equation<sup>a</sup>

| Data                   | $R$ (Å)  | $R_0$ (Å) | $\delta R$ | $\delta R/R_0$ | $x$     |
|------------------------|----------|-----------|------------|----------------|---------|
| H <sub>2</sub> , 483 K | 2.748(2) | -         | 0.015(4)   | 0.005(1)       | 0.08(2) |
| H <sub>2</sub> , 383 K | 2.799(3) | -         | 0.058(5)   | 0.021(2)       | 0.35(4) |
| H <sub>2</sub> , 293 K | 2.813(2) | -         | 0.072(3)   | 0.026(1)       | 0.44(2) |
| H <sub>2</sub> , 186 K | 2.826(1) | -         | 0.085(2)   | 0.031(1)       | 0.54(2) |
| He, 483 K              | -        | 2.733(2)  | -          | -              | -       |
| He, 383 K              | -        | 2.741(2)  | -          | -              | -       |
| He, 293 K              | -        | 2.741(1)  | -          | -              | -       |

<sup>a</sup>The modified empirical equation:  $\frac{\delta R(T)}{R_0(T)} = 0.0666x - 0.0164x^2$ , where  $R(T)$  is the bond length of Pd hydride at the temperature  $T$ ;  $R_0(T)$  is the bond length of bare metal particles free of hydrogen at the temperature of  $T$ ;  $\delta R(T)$  is defined as  $(R - R_0)$  and calculated at the same temperature; The value of  $R_0$  for the data at 186 K is taken as 2.741(1) Å;  $x$  is the H/Pd ratio.
